# Supplementary material for: Twelve-Month Follow-Up of a Randomized Controlled Trial of Internet-Based Guided Self-Help for Parents of Children on Cancer Treatment
Source: PubMed Central journal article supplement (PMC5553001; doi:10.2196/jmir.6852), 2017-07-27
Supplement: jmir_v19i7e273_app1.pdf [file jmir_v19i7e273_app1.pdf]

| PCL-C               |                 | Model A            | Model B           | Model C            | Model D             |
|---------------------|-----------------|--------------------|-------------------|--------------------|---------------------|
| Nr of param.        |                 | 3                  | 5                 | 7                  | 9                   |
| Fixed effects       |                 |                    |                   |                    |                     |
| Initial status      | Intercept       | 45.27***<br>(1.39) | 48.1***<br>(1.45) | 46.04***<br>(2.14) | 46.26***<br>(2.09)  |
|                     | Group           |                    |                   | 3.83<br>(2.29)     | 5.22<br>(2.86)      |
| Rate of change      | Linear          |                    | -4.01**<br>(1.10) | -0.49<br>(1.37)    | -2.29<br>(4.06)     |
|                     | Quadratic       |                    |                   |                    | 1.11<br>(2.00)      |
|                     | Linear*group    |                    |                   | -6.95**<br>(1.95)  | -21.87***<br>(5.92) |
|                     | Quadratic*group |                    |                   |                    | 7.47*<br>(2.90)     |
| Variance components |                 |                    |                   |                    |                     |
| Level 1             | Within          | 91.45*<br>(15.24)  | 76.00*<br>(14.55) | 67.26**<br>(12.59) | 50.91*<br>(10;61)   |
| Level 2             | Initial status  | 64.03*<br>(21.37)  | 53.62*<br>(19.48) | 63.89**<br>(20.14) | 67.46*<br>(19.11)   |
|                     | Rate of change  |                    | 7.05<br>(10.39)   | 1.30<br>(8.37)     | 6.36<br>(8.63)      |
| Fit indices         |                 |                    |                   |                    |                     |
| -2loglikelihood     |                 | 985.65             | 970.49            | 959.13             | 944.46              |
| $\Delta D$          |                 |                    | 15.16***          | 11.36***           | 14.67***            |
| AIC                 |                 | 991.65             | 980.49            | 973.13             | 962.46              |
| BIC                 |                 | 1000.18            | 994.71            | 993.01             | 988.06              |

Note.  $\Delta D$ , the test of the difference in -2loglikelihood statistic according to the chi-2 distribution. AIC, Akaike Information Criteria. BIC, Bayesian Information Criteria.

\*P<.05

\*\*P<.01

\*\*\*P<.001
