# Supplementary material for: Twelve-Month Follow-Up of a Randomized Controlled Trial of Internet-Based Guided Self-Help for Parents of Children on Cancer Treatment
Source: PubMed Central journal article supplement (PMC5553001; doi:10.2196/jmir.6852), 2017-07-27
Supplement: jmir_v19i7e273_app2.pdf [file jmir_v19i7e273_app2.pdf]

| BDI                 |                 | Model A            | Model B            | Model C            | Model D            |
|---------------------|-----------------|--------------------|--------------------|--------------------|--------------------|
| Nr of param.        |                 | 3                  | 5                  | 7                  | 9                  |
| Fixed effects       |                 |                    |                    |                    |                    |
| Initial status      | Intercept       | 18.56***<br>(0.93) | 20.22***<br>(0.96) | 19.33***<br>(1.45) | 19.29***<br>(1.48) |
|                     | Group           |                    |                    | 1.61<br>(1.99)     | 2.35<br>(2.02)     |
| Rate of change      | Linear          |                    | -2.30**<br>(0.80)  | 0.41<br>(0.92)     | 0.63<br>(2.84)     |
|                     | Quadratic       |                    |                    |                    | -0.09<br>(1.40)    |
|                     | Linear*group    |                    |                    | -5.58***<br>(1.31) | -13.28**<br>(4.13) |
|                     | Quadratic*group |                    |                    |                    | 3.90<br>(2.03)     |
| Variance components |                 |                    |                    |                    |                    |
| Level 1             | Within          | 42;43*<br>(6.88)   | 32.61*<br>(6.28)   | 28.17*<br>(5.20)   | 25.00*<br>(4.79)   |
| Level 2             | Initial status  | 28.55*<br>(9.18)   | 24.74*<br>(8.76)   | 31.98*<br>(9.36)   | 33.85*<br>(9.37)   |
|                     | Rate of change  |                    | 6.93<br>(5.29)     | 1.52<br>(3.65)     | 2.01<br>(3.48)     |
| Fit indices         |                 |                    |                    |                    |                    |
| -2loglikelihood     |                 | 886.82             | 873.55             | 852.17             | 851.93             |
| $\Delta D$          |                 |                    | 13.27***           | 21.38***           | 0.24               |
| AIC                 |                 | 892.82             | 883.55             | 872.17             | 869.93             |
| BIC                 |                 | 901.35             | 897.77             | 892.08             | 895.53             |

Note.  $\Delta D$ , the test of the difference in -2loglikelihood statistic according to the chi-2 distribution. AIC, Akaike Information Criteria. BIC, Bayesian Information Criteria.

\*P<.05

\*\*P<.01

\*\*\*P<.001
