# Supplementary material for: Twelve-Month Follow-Up of a Randomized Controlled Trial of Internet-Based Guided Self-Help for Parents of Children on Cancer Treatment
Source: PubMed Central journal article supplement (PMC5553001; doi:10.2196/jmir.6852), 2017-07-27
Supplement: jmir_v19i7e273_app3.pdf [file jmir_v19i7e273_app3.pdf]

| BAI                 |                 | Model A            | Model B            | Model C            | Model D            |
|---------------------|-----------------|--------------------|--------------------|--------------------|--------------------|
| Nr of parameters    |                 | 3                  | 5                  | 7                  | 9                  |
| Fixed effects       |                 |                    |                    |                    |                    |
| Initial status      | Intercept       | 13.36***<br>(0.97) | 14.20***<br>(1.02) | 11.48***<br>(1.52) | 11.89***<br>(1.52) |
|                     | Group           |                    |                    | 5.11*<br>(2.08)    | 5.27*<br>(2.08)    |
| Rate of change      | Linear          |                    | -1.22<br>(0.74)    | 1.84*<br>(0.83)    | -1.81<br>(2.73)    |
|                     | Quadratic       |                    |                    |                    | 1.90<br>(1.35)     |
|                     | Linear*group    |                    |                    | -6.06***<br>(1.17) | -8.57*<br>(3.90)   |
|                     | Quadratic*group |                    |                    |                    | 1.23<br>(1.91)     |
| Variance components |                 |                    |                    |                    |                    |
| Level 1             | Within          | 35.1*<br>(6.04)    | 30.48*<br>(6.23)   | 22.93*<br>(4.53)   | 21.1*<br>(4.11)    |
| Level 2             | Initial status  | 35.85*<br>(10.65)  | 32.97*<br>(10.34)  | 40.65*<br>(11.06)  | 41.20*<br>(10.80)  |
|                     | Rate of change  |                    | 4.39<br>(4.58)     | 0.23<br>(3.04)     | 0.96<br>(2.97)     |
| Fit indices         |                 |                    |                    |                    |                    |
| 2loglikelihood      |                 | 864.01             | 859.48             | 837.70             | 830.83             |
| $\Delta D$          |                 |                    | 4.53               | 21.78***           | 6.87*              |
| AIC                 |                 | 870.01             | 869.48             | 851.7              | 848.83             |
| BIC                 |                 | 878.50             | 883.62             | 871.5              | 874.29             |

Note.  $\Delta D$ , the test of the difference in -2loglikelihood statistic according to the chi-2 distribution. AIC, Akaike Information Criteria. BIC, Bayesian Information Criteria.

\*P<.05

\*\*P<.01

\*\*\*P<.001
