# Supplementary material for: Twelve-Month Follow-Up of a Randomized Controlled Trial of Internet-Based Guided Self-Help for Parents of Children on Cancer Treatment
Source: PubMed Central journal article supplement (PMC5553001; doi:10.2196/jmir.6852), 2017-07-27
Supplement: jmir_v19i7e273_app4.pdf [file jmir_v19i7e273_app4.pdf]

|                                                         |                                                   | Intervention         | Control              | Chi-square <sup>a</sup> |  | P value |
|---------------------------------------------------------|---------------------------------------------------|----------------------|----------------------|-------------------------|--|---------|
| Pre                                                     |                                                   | (n=31)               | (n=27)               |                         |  |         |
| <b>Health care contact during the last month, n (%)</b> |                                                   |                      |                      |                         |  |         |
|                                                         | GP <sup>b</sup>                                   | 8 (26)               | 3 (11)               | 2.03                    |  | .15     |
|                                                         | Occupational health                               | 1 (3)                | 0 (0)                |                         |  | >.99    |
|                                                         | Social worker                                     | 20 (65)              | 8 (30)               | 7.03                    |  | .01     |
|                                                         | Physiotherapist                                   | 4 (13)               | 2 (7)                |                         |  | .68     |
|                                                         | Mental health, private practice <sup>c</sup>      | 3 (10)               | 2 (7)                |                         |  | >.99    |
|                                                         | Mental health, community outpatient <sup>d</sup>  | 2 (7)                | 0 (0)                |                         |  | .49     |
|                                                         | Specialist physician, general hospital            | 5 (16)               | 3 (11)               |                         |  | .71     |
|                                                         | Specialist physician, university hospital         | 3 (10)               | 4 (15)               |                         |  | .69     |
|                                                         | Sick leave during the last month, yes versus no   | 8 (27)               | 4 (15)               | 1.20                    |  | .27     |
| Post                                                    |                                                   | (n=17)               | (n=16 <sup>d</sup> ) |                         |  |         |
| <b>Health care contact during the last month, n (%)</b> |                                                   |                      |                      |                         |  |         |
|                                                         | GP                                                | 6 (35)               | 2 (13)               |                         |  | .23     |
|                                                         | Occupational health                               | 0 (0)                | 0 (0)                |                         |  | -       |
|                                                         | Social worker                                     | 5 (29)               | 5 (31)               |                         |  | >.99    |
|                                                         | Physiotherapist                                   | 0 (0)                | 0 (0)                |                         |  | -       |
|                                                         | Mental health (private practice) <sup>e</sup>     | 1 (6)                | 1 (6)                |                         |  | >.99    |
|                                                         | Mental health (community outpatient) <sup>d</sup> | 0 (0)                | 3 (19)               |                         |  | >.99    |
|                                                         | Specialist physician (general hospital)           | 1 (6)                | 0 (0)                |                         |  | >.99    |
|                                                         | Specialist physician (university hospital)        | 0 (0)                | 2 (13)               |                         |  | .23     |
|                                                         | Sick leave during the last month, yes versus no   | 5 (31)               | 2 (13)               |                         |  | .39     |
| 12-month follow-up                                      |                                                   | (n=15 <sup>f</sup> ) | (n=16)               |                         |  |         |
| <b>Health care contact during the last month, n (%)</b> |                                                   |                      |                      |                         |  |         |
|                                                         | GP                                                | 4 (27)               | 2 (13)               |                         |  | .39     |
|                                                         | Occupational health                               | 1 (7)                | 0 (0)                |                         |  | .48     |
|                                                         | Social worker                                     | 4 (27)               | 4 (25)               |                         |  | >.99    |
|                                                         | Physiotherapist                                   | 3 (20)               | 1 (6)                |                         |  | .33     |
|                                                         | Mental health, private                            | 0 (0)                | 2 (13)               |                         |  | .48     |

|  |                                                       |        |        |  |  |      |
|--|-------------------------------------------------------|--------|--------|--|--|------|
|  | practice <sup>c</sup>                                 |        |        |  |  |      |
|  | Mental health,<br>community outpatient <sup>d</sup>   | 0 (0)  | 0 (0)  |  |  | -    |
|  | Specialist physician,<br>general hospital             | 2 (13) | 0 (0)  |  |  | .23  |
|  | Specialist physician,<br>university hospital          | 2 (13) | 2 (13) |  |  | >.99 |
|  | Sick leave during the<br>last month, yes versus<br>no | 3 (20) | 2 (13) |  |  | .65  |

<sup>a</sup>Chi-square: *P* values reported are for chi-square tests (or Fisher exact test when no statistic is provided) with two-sided probabilities.

<sup>b</sup>GP: general practitioner.

<sup>c</sup>Includes psychologist, psychiatrist, and psychotherapist in private practice.

<sup>d</sup>Includes psychologist, psychiatrist, and psychotherapist in community outpatient settings.

<sup>e</sup>Four participants who participated in the postassessment had missing data on health care consumption and sick leave.

<sup>f</sup>One participant who participated in the postassessment had missing data on health care consumption and sick leave.
